# Supplementary material
Source: Springer Nature journal article supplement (https://www.springermedizin.de/resource/supplementary/12886_2011_228_MOESM3_ESM.pdf/9473564)

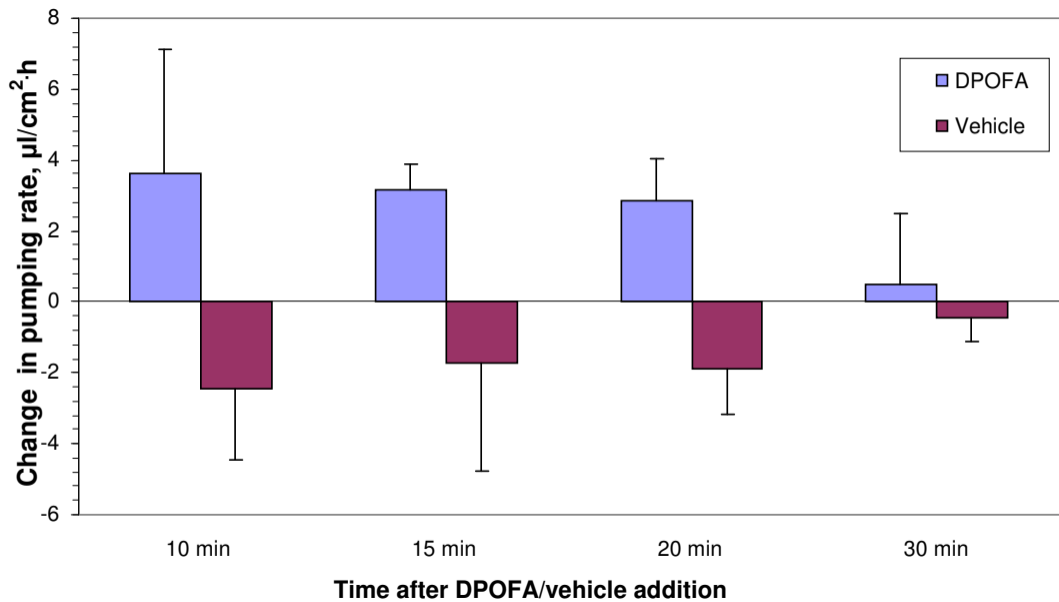

Supplement: MOESM3 [file 9473564]
